# Supplementary material for: Synthesis of a new polyaniline/nanotube composite: “in-situ” polymerisation and charge transfer through site-selective interaction
Source: Royal Society of Chemistry journal article supplement (doi:10.1039/b104009j), 2001-01-01

Electron micrographs of PANI/MWNT composites. SEM of composite 10 wt% (a) and 30 wt% (b). TEM of composite 30 wt% (c). All micrographs confirm that MWNTs are irregularly mixed with the polymer matrix and that no additional order has been introduced.


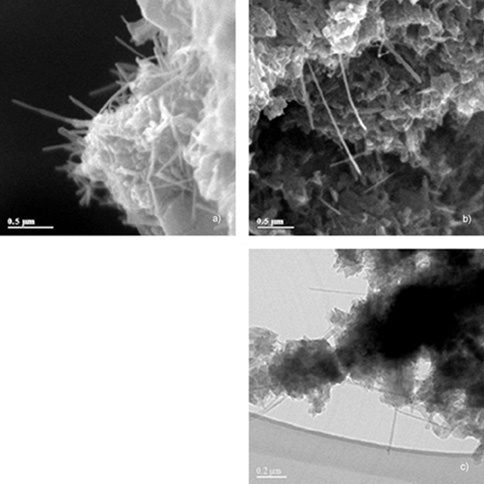

Supplement: b104009j.doc [file b104009j.doc]
